# Supplementary material for: Orthogonal magnetic structures of Fe4O5: representation analysis and DFT calculations
Source: Royal Society of Chemistry journal article supplement (doi:10.1039/d3dt03437b), 2023-12-19
Supplement: d3dt03437b1.pdf [file d3dt03437b1.pdf]

Supplementary Materials for:  
Orthogonal magnetic structures of Fe<sub>4</sub>O<sub>5</sub>:  
representation analysis and DFT calculations

V.S. Zhandun<sup>1,\*</sup>, N.V. Kazak<sup>1</sup>, I. Kuppenko<sup>2</sup>, D.M. Vasiukov<sup>3</sup>, X. Li<sup>2</sup>, E.  
Blackburn<sup>3</sup>, and S.G. Ovchinnikov<sup>1</sup>

*<sup>1</sup>Kirensky Institute of Physics, Federal Research Center KSC SB RAS, 660036  
Krasnoyarsk, Russia*

*<sup>2</sup>Institut für Mineralogie, University of Münster, Corrensstr. 24, 48149 Münster,  
Germany*

*<sup>3</sup>Division of Synchrotron Radiation Research, Department of Physics, Lund  
University, Box 118, Lund 221 00, Sweden*

*\*Corresponding author: [jvc@iph.krasn.ru](mailto:jvc@iph.krasn.ru)*

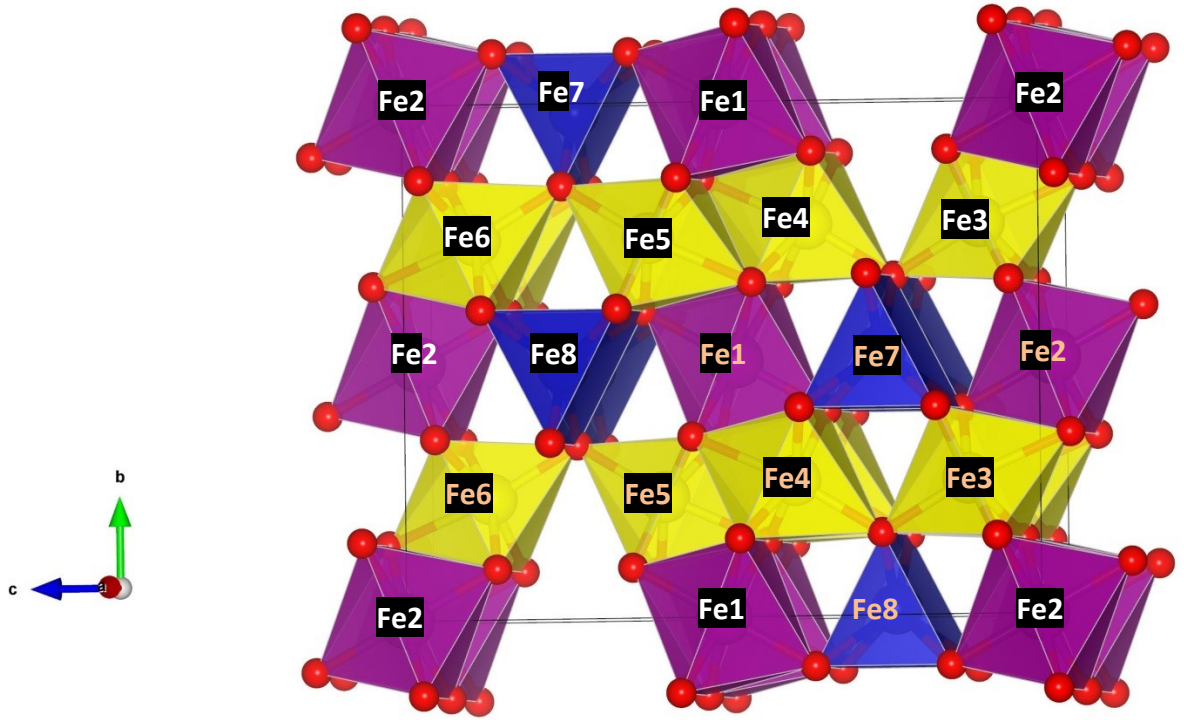

Figure S1. The numbering of the magnetically independent atoms  $Fe_i$  ( $i=1-8$ ) for the magnetic propagation vector  $k = (0, 0, 0)$ . For  $k = (1/2, 0, 0)$  the magnetic moment of  $j$ '-th atom is transformed according to the expression  $m(R_j + a) = -\Psi(R_j)$ , where  $\Psi(R_j)$  is a basis vector of  $i$ -th Fe atom and  $a$  is a lattice constant,  $R_j = R_j + a$ .

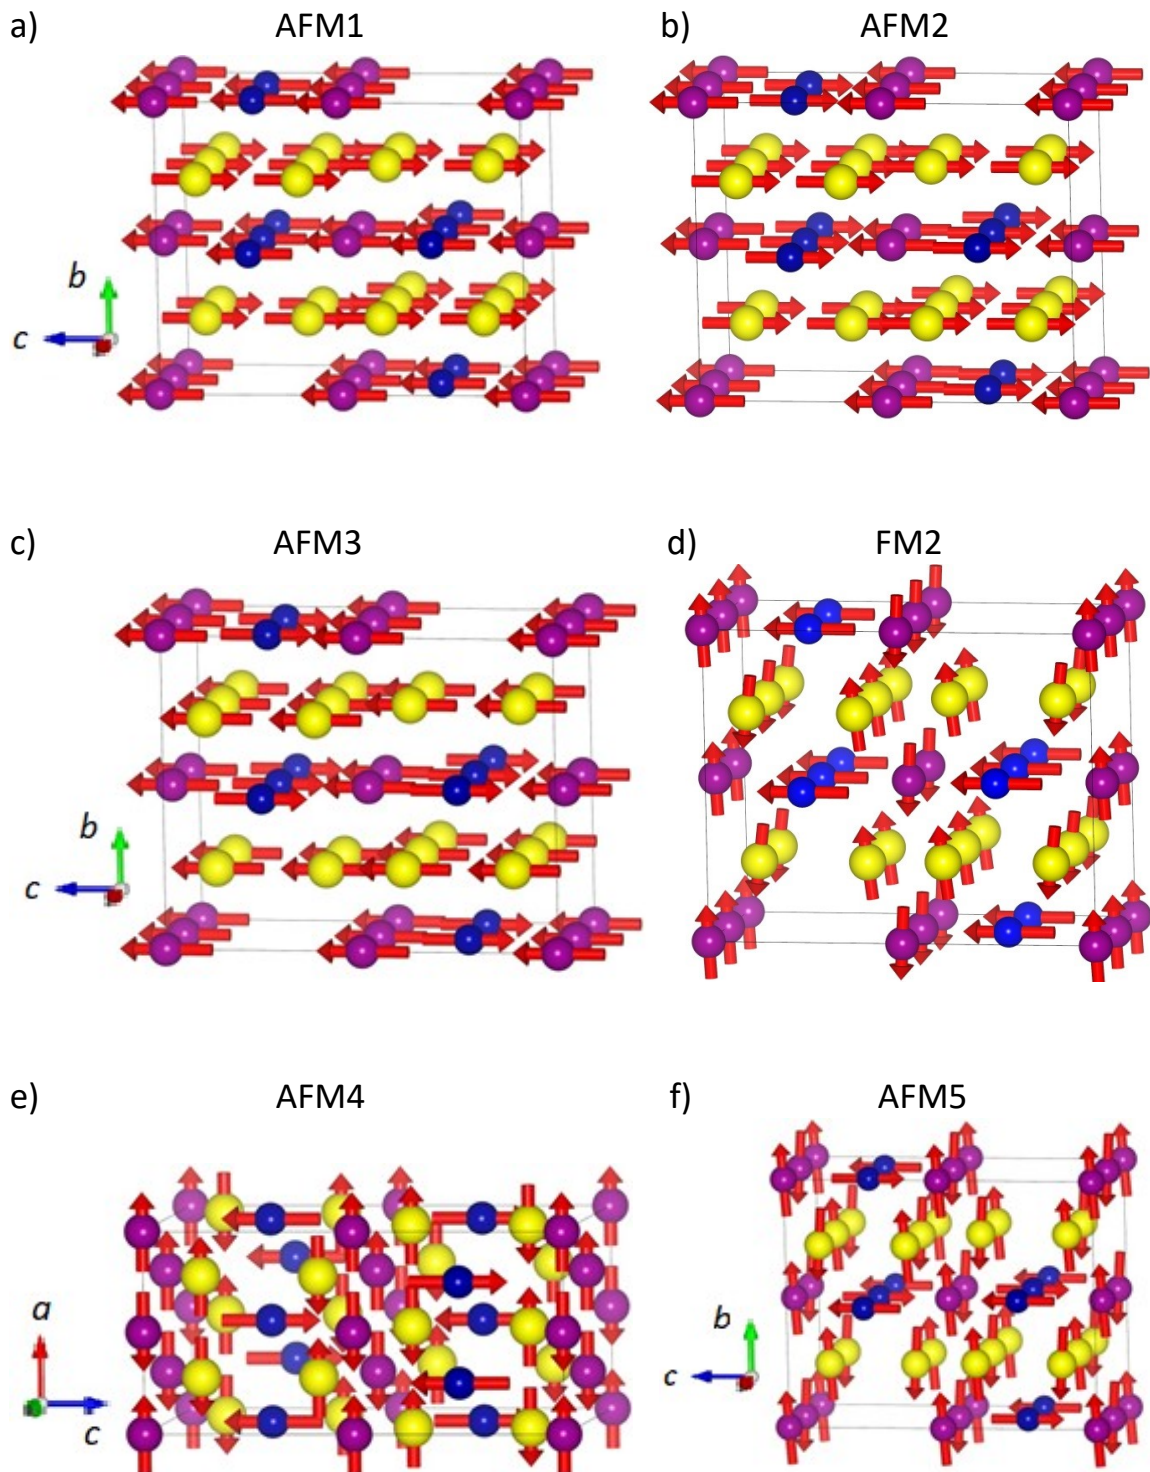

Figure S2. The AFM1-AFM3 (a-c), FM2 (d) and AFM4-5 (e-f) magnetic structures. All magnetic structures are shown within doubled unit cell along the  $a$  axis. The arrows show the directions of the Fe spins at the Fe1 (purple), Fe2 (yellow), and Fe3 (blue) sites.

Table S1. The spin configurations, Fe magnetic moment components, and total energies for the AFM6 and FM3 phases in  $\text{CaFe}_3\text{O}_5$ . The arrows show the spin alignment within Fe2-Fe1-Fe2 triad, the  $\uparrow$  stands for spin up and  $\downarrow$  for spin down.

| Magnetic (charge) ordering | Magnetic propagation vector, $k$ | Spin config.                 | $\Delta E$ (meV/Fe atom) | Magn. moment ( $\mu_B$ ) |                          |
|----------------------------|----------------------------------|------------------------------|--------------------------|--------------------------|--------------------------|
|                            |                                  |                              |                          | Fe1(4a)                  | Fe2(8f)                  |
| AFM6                       | $(1/2, 0, 0)$                    | $\uparrow\downarrow\uparrow$ | 0                        | $(0.00, 0.00, \pm 3.67)$ | $(0.00, 0.00, \pm 4.10)$ |
| FM3                        | $(0, 0, 0)$                      | $\uparrow\uparrow\uparrow$   | 6.5                      | $(0.00, 0.00, \pm 3.60)$ | $(0.00, 0.00, \pm 4.15)$ |

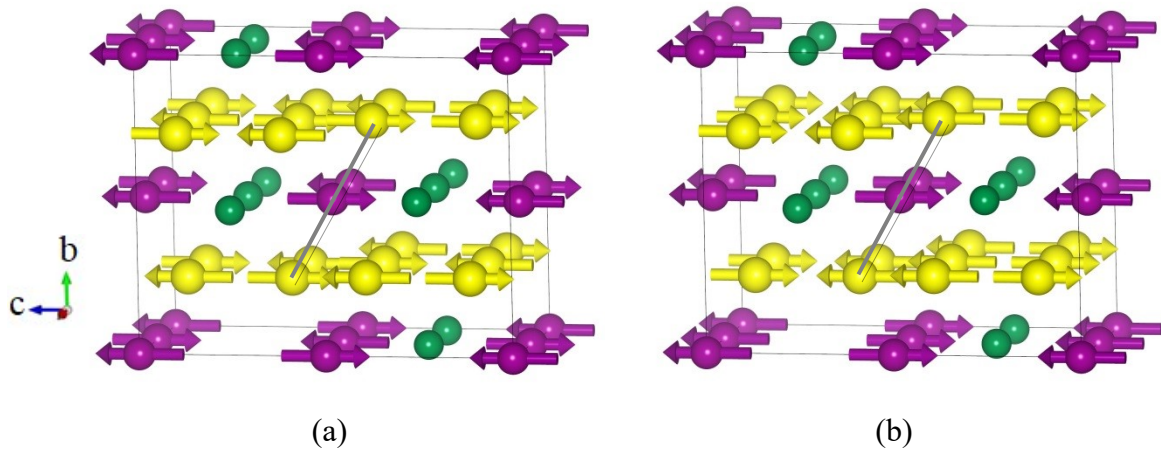

Figure S3. The orthogonal antiferromagnetic structures of  $\text{CaFe}_3\text{O}_5$  for the AFM6 phase with propagation vector  $k = (1/2, 0, 0)$  (a) and FM3 phase with  $k = (0, 0, 0)$  (b). The magnetic structure of FM3 phase is shown within doubled cell along the  $a$ -axis. The arrows show the directions of the Fe spins at the 4a (purple) and 8f (yellow) sites. The nonmagnetic calcium atoms at 4c sites are highlighted in green. The dashed lines indicate the ferromagnetic (a) and antiferromagnetic (b) orderings within triad Fe2-Fe1-Fe2.

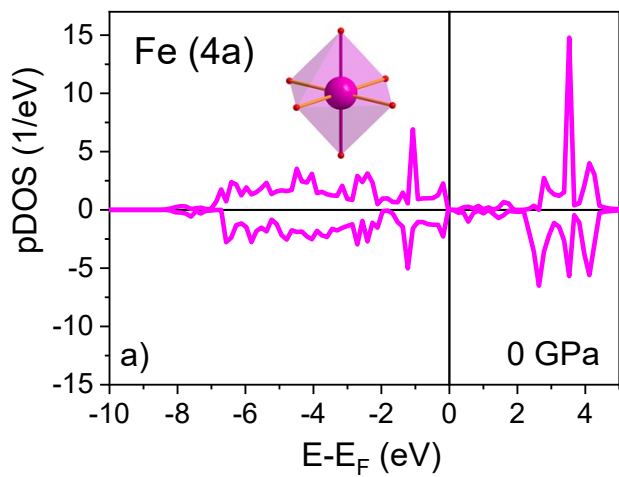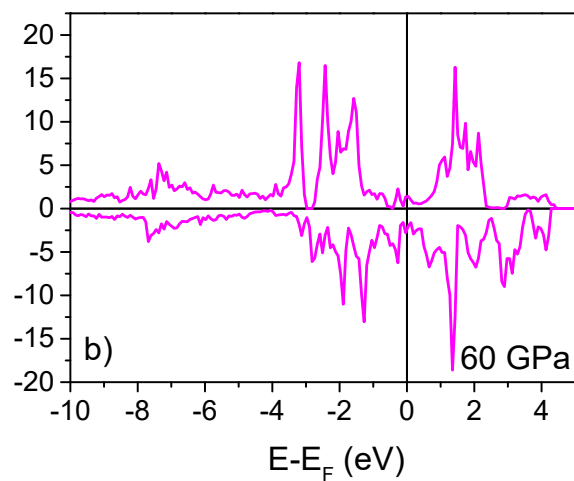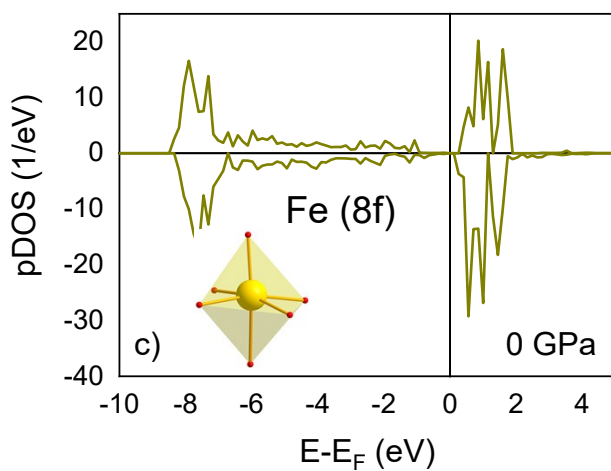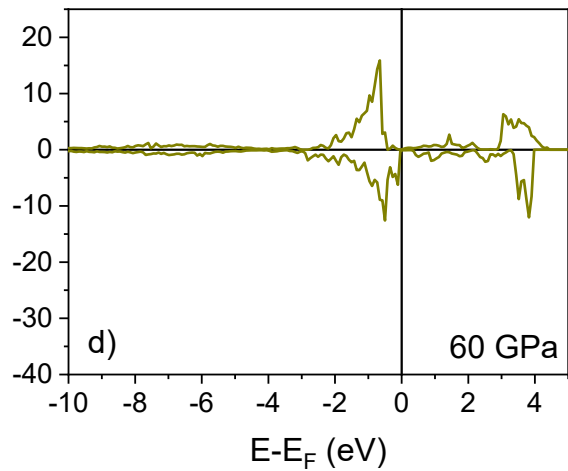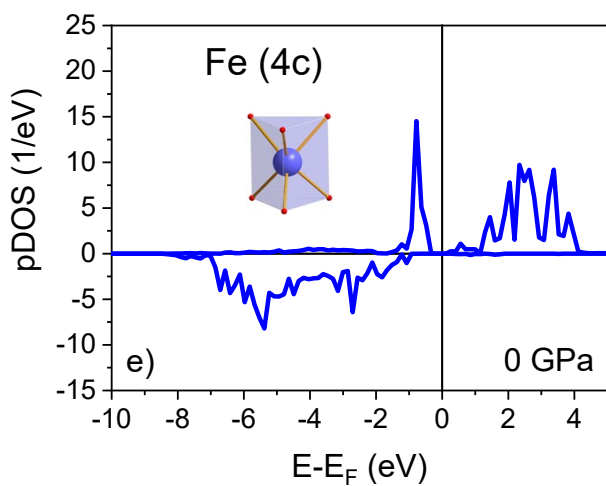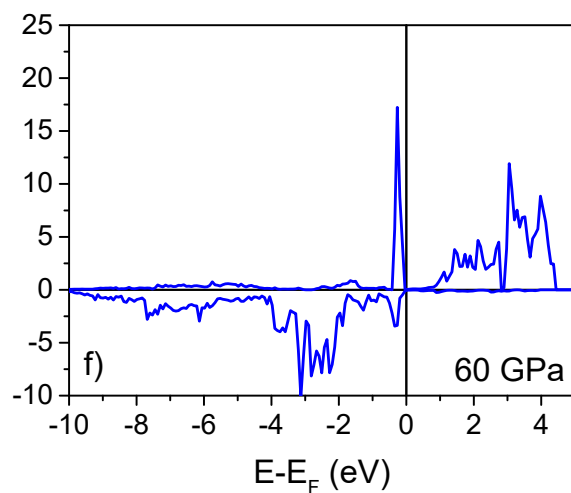

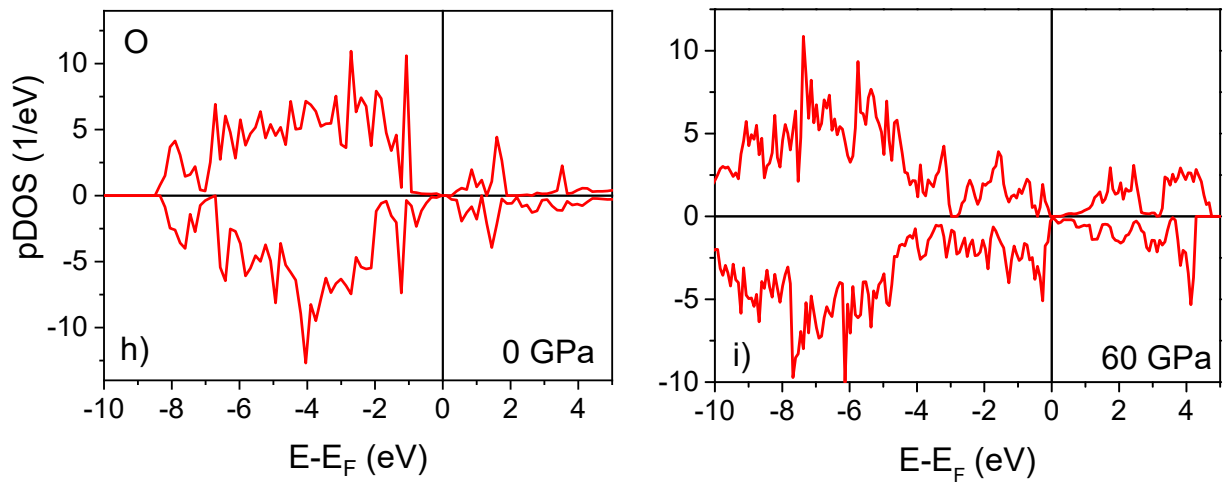

Figure S4. The iron projected density of  $d$ -electronic states (DOS) (a, b) Fe1, (c, d) Fe2, (e, g) Fe3; (h, i) oxygen projected density of  $p$ -electronic states of  $\text{Fe}_4\text{O}_5$  at ambient pressure and  $P_{\text{MIT}}=60$  GPa. The straight lines correspond to Fermi energy. Negative values of DOS show spin-down states.
